# Supplementary material
Source: publisher figshare collection journal article supplement (https://gsajournals.figshare.com/ndownloader/files/14994905)
Supplement: Supplementary file 1 [file 14994905]

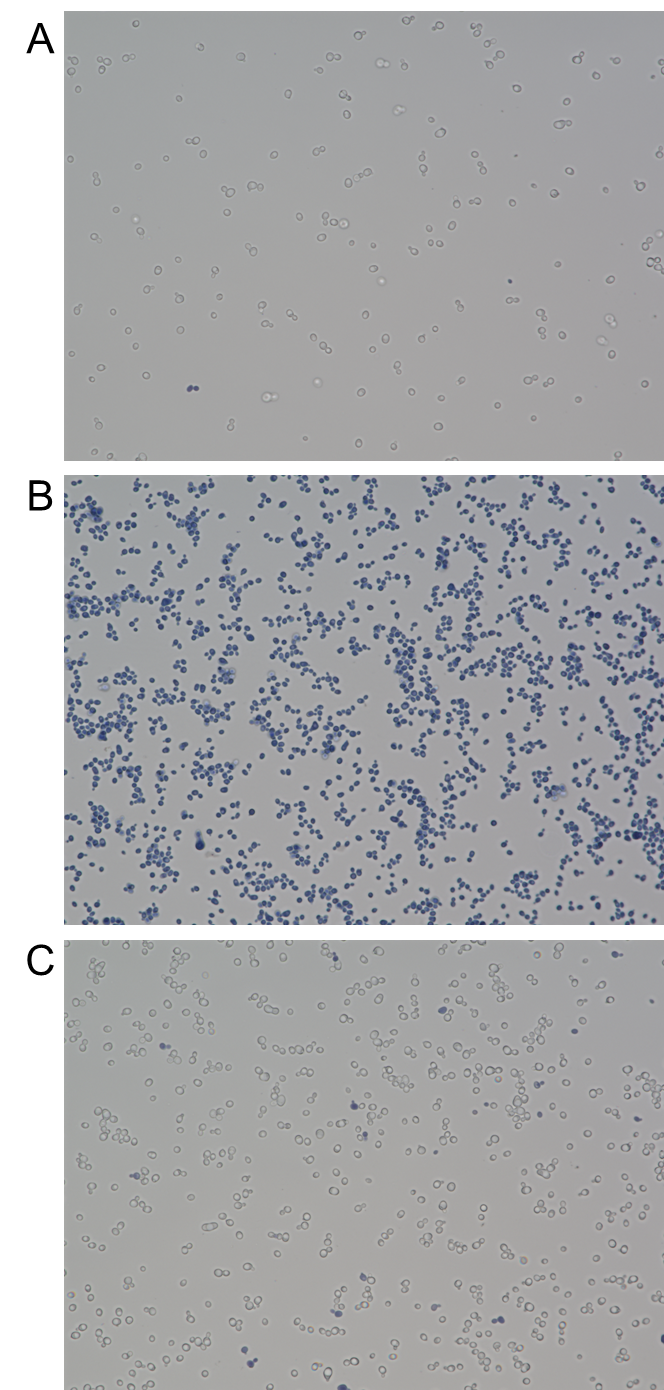


**Figure S1**. Trypan blue exclusion stain of (A) non-irradiated, (B) heat-killed, and (C) laser-irradiated cells. Live cells exclude the blue dye. The images are representative of 9 fields collected for each condition.
